# Supplementary material
Source: PubMed Central journal article supplement (PMC3777750)

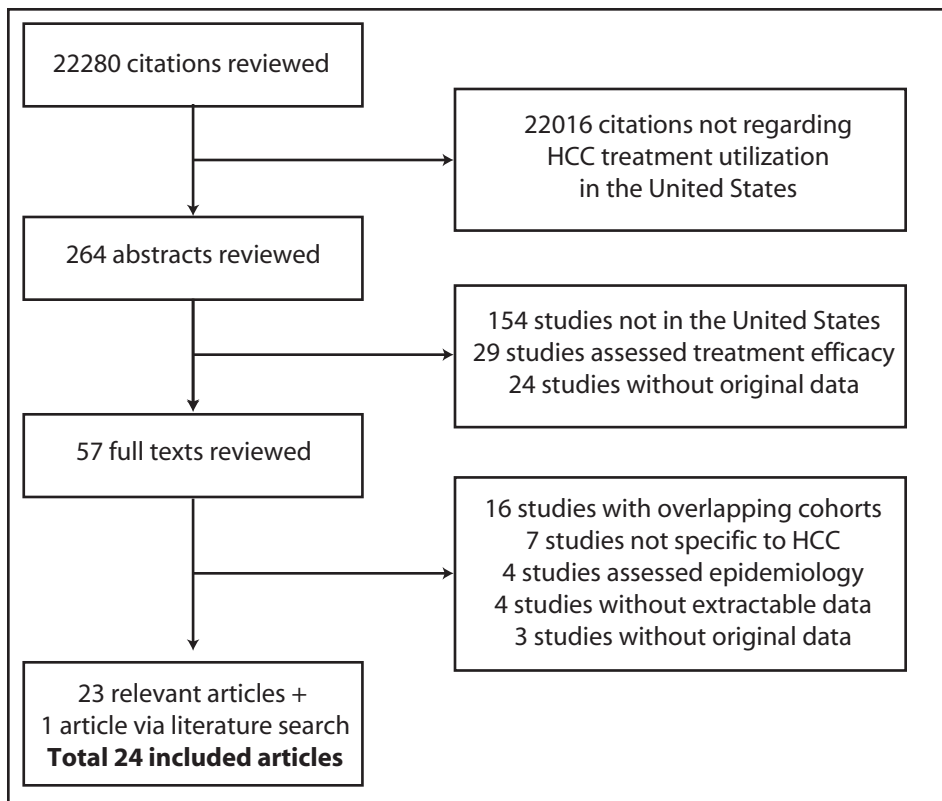

Supplement: NIHMS511333-supplement-Supp_Fig_S1.pdf [file NIHMS511333-supplement-Supp_Fig_S1.pdf]
